# Supplementary material for: Interfacial engineering of a nanofibrous Ru/Cr2O3 heterojunction for efficient alkaline/acid-universal hydrogen evolution at the ampere level
Source: Royal Society of Chemistry journal article supplement (doi:10.1039/d5sc00248f), 2025-01-01
Supplement: d5sc00248f1.pdf [file d5sc00248f1.pdf]

## Interfacial engineering of a nanofibrous Ru/Cr<sub>2</sub>O<sub>3</sub> heterojunction for efficient alkaline/acid-universal hydrogen evolution at the ampere level

Xianqiang Yu<sup>a</sup>, Mingze Xia<sup>a</sup>, Ruikai Qi<sup>a</sup>, Yuezhu Wang<sup>a</sup>, Mingbin Gao<sup>b,\*</sup>, Mengxiao Zhong<sup>c,\*</sup>, Xiaofeng Lu<sup>a,\*</sup>

<sup>a</sup>Alan G. MacDiarmid Institute, College of Chemistry, Jilin University, Changchun 130012, P.R. China. E-mail: xflu@jlu.edu.cn

<sup>b</sup>State Key Laboratory of Physical Chemistry of Solid Surfaces, College of Chemistry and Chemical Engineering, Xiamen University, Xiamen 361005, China. Email: mbgao@xmu.edu.cn

<sup>c</sup>State Key Laboratory of Integrated Optoelectronics, Key Laboratory of Advanced Gas Sensors, Jilin Province, College of Electronic Science and Engineering, Jilin University, Changchun, 130012 P. R. China. E-mail: zhongmx@jlu.edu.cn

## EXPERIMENTAL SECTION

### Materials

Poly(vinylpyrrolidone) (PVP,  $M_w=1300000$  g mol<sup>-1</sup>) and chromic acetate (Cr(Ac)<sub>3</sub>) were acquired from Aladdin Chemistry Co., Ltd. Ruthenium trichloride (RuCl<sub>3</sub>·xH<sub>2</sub>O), Nafion solution (5 wt%) was supplied by Sigma-Aldrich (Shanghai). Ethanol (EtOH) and N, N-dimethylformamide (DMF) were purchased from Sinopharm Chemical Reagent Co. Ltd. Commercial Pt/C (20 wt%) was obtained from Johnson Matthey. All chemicals were used without additional purification and deionized water was used for all experiments.

### Synthesis of RuCrO<sub>x</sub> NFs

The preparation of RuCrO<sub>x</sub> NFs involved an electrospinning technique coupled with a calcination process. Initially, a conventional electrospinning method was employed to prepare the RuCl<sub>3</sub>/Cr(Ac)<sub>3</sub>/PVP precursor nanofibrous membrane. In a typical experiment, RuCl<sub>3</sub>·xH<sub>2</sub>O and Cr(Ac)<sub>3</sub> (molar ratio of 3:1 and a total mass of 0.3 g) were firstly dissolved in a mixed solvent consisting of 1.8 mL of DMF and 1.8 mL of EtOH. After the salts were completely dissolved through magnetic stirring at room temperature, 0.3 g of PVP was added into the system. Subsequently, a homogeneous

solution was obtained by continuous stirring overnight. This solution was then used directly for electrospinning under a high voltage of 18 kV and a distance of around 25 cm between the spinneret and the plane collector, then the  $\text{RuCl}_3/\text{Cr}(\text{Ac})_3/\text{PVP}$  precursor nanofibrous membrane was obtained on the surface of collector. The precursor nanofibrous membrane was then placed in a muffle furnace and subjected to a calcination process at  $500^\circ\text{C}$  for 2 h, with a heating speed of  $2^\circ\text{C min}^{-1}$  in an air atmosphere. And then, the  $\text{RuCrO}_x$  NFs were achieved.

### **Synthesis of $\text{Ru}/\text{Cr}_2\text{O}_3$ HNFs**

The obtained  $\text{RuCrO}_x$  NFs were transferred into a tubular furnace and heated under an  $\text{Ar}/\text{H}_2$  atmosphere with a volume ratio of 95:5 at  $350^\circ\text{C}$  for 2 h, at a heating rate of  $10^\circ\text{C min}^{-1}$ . Ultimately, the  $\text{Ru}/\text{Cr}_2\text{O}_3$  HNFs were acquired after the furnace temperature was allowed to cool down to ambient conditions. To create different control sample, the molar ratios of  $\text{RuCl}_3 \cdot x\text{H}_2\text{O}$  to  $\text{Cr}(\text{Ac})_3$  in the spinning solution were varied (1:1, 2:1, and 4:1), while all other processing conditions were kept constant. These varied samples were designated as  $\text{Ru}/\text{Cr}_2\text{O}_3$ -1 HNFs,  $\text{Ru}/\text{Cr}_2\text{O}_3$ -2 HNFs and  $\text{Ru}/\text{Cr}_2\text{O}_3$ -4 HNFs, respectively.

### **Synthesis of Ru NFs and R- $\text{Cr}_2\text{O}_3$ NFs**

For comparative purposes, spinning solutions composed exclusively of  $\text{RuCl}_3 \cdot x\text{H}_2\text{O}$  or  $\text{Cr}(\text{Ac})_3$  were also configured. The resulting samples, following electrospinning and calcination, were designated as  $\text{RuO}_2$  NFs and  $\text{Cr}_2\text{O}_3$  NFs, respectively. Subsequently, these samples underwent a thermal reduction treatment in an  $\text{Ar}/\text{H}_2$  atmosphere for 2 h. The resulting products were named as Ru NFs and R- $\text{Cr}_2\text{O}_3$  NFs, respectively.

### **Characterization**

Field-emission scanning electron microscopy (FESEM, FEI Nova Nano-SEM) and transition electron microscopy (TEM, JEM-2100) were employed to explore the morphology of the as-prepared samples. High-resolution TEM (HRTEM) images, energy-dispersive X-ray (EDX) spectroscopy patterns, elemental mapping analysis, high-angle annular dark-field scanning TEM (HAADF-STEM) and selected area electron diffraction (SAED) were recorded on FEI Tecnai G2 F20. X-ray diffraction (XRD) measurement was carried out on PANalytical B.V. Empyrean with  $\text{Cu K}\alpha$

radiation to ascertain the crystal structures of the as-prepared samples. X-ray photoelectron spectroscopy (XPS, Thermo Scientific ESCALAB250) was used to confirm the chemical composition of the samples. N<sub>2</sub> adsorption-desorption experiment was performed using AutoSorb-IQ instrument. Inductively coupled plasma-optical emission spectrometry (ICP-OES) measurement was carried out on an Agilent 725 instrument.

### Electrochemical Measurements

All electrochemical tests were implemented on a CHI 760E electrochemical workstation, employing a typical three- or two-electrode configuration in either alkaline electrolyte (1 M KOH) or acidic electrolyte (0.5 M H<sub>2</sub>SO<sub>4</sub>). For the hydrogen evolution reaction (HER) tests, a standard three-electrode system was utilized, with a catalyst-modified carbon paper (CP) serving as the working electrode. The reference electrode consisted of Hg/HgO for alkaline electrolyte or Ag/AgCl for acidic conditions, while graphite rod was used as the counter electrode. The catalyst ink (4 mg mL<sup>-1</sup>) was prepared by blending 4 mg of catalyst, 490 µL of water, 490 µL of EtOH, and 20 µL of 5 wt% Nafion solution. This ink was then coated on the CP (0.09 cm<sup>2</sup>) via drop-casting, achieving a mass loading of 1 mg cm<sup>-2</sup>. The potential measurements were referenced against a reversible hydrogen electrode (RHE), with calibration performed using the respective reference electrode (Fig. S26). According to Fig. S26, the potentials were converted to RHE using the following equation:

$$E_{\text{RHE}} = E_{\text{Hg/HgO}} + 0.918 \text{ V}$$

$$E_{\text{RHE}} = E_{\text{Ag/AgCl}} + 0.214 \text{ V}$$

Throughout the electrochemical measurement, the electrolyte was continuously purged with argon gas to ensure an inert environment. To establish a stable state for the working electrodes, several cyclic voltammetry (CV) cycles were initially performed. Linear scan voltammetry (LSV) was then conducted at a scan rate of 2 mV s<sup>-1</sup> for each catalyst to evaluate its performance. Electrochemical impedance spectroscopy (EIS) was performed within a frequency range of 10<sup>-1</sup>–10<sup>5</sup> Hz and acquired at potential of approximately –1.0 V vs. Hg/HgO electrode in alkaline electrolyte, or around –0.3 V vs. Ag/AgCl electrode in acidic electrolyte. The CV tests with various scan rates (10–

100 mV s<sup>-1</sup>) were conducted within the potential window from -0.75 to -0.65 V vs. Hg/HgO electrode, or 0.1 to 0.2 V vs. Ag/AgCl electrode to determine the electrochemical double layer capacitance ( $C_{dl}$ ) of the catalysts. The  $C_{dl}$  was calculated by plotting  $\Delta j/2$  against the scan rate, where the slope of the linear region represents the  $C_{dl}$  value. The electrochemical active surface area (ECSA) is proportional to the  $C_{dl}$  value and can be derived using the following equation:

$$ECSA = (C_{dl} \times S)/C_s$$

Roughness factor (RF) is also calculated below:

$$RF = ECSA/S$$

The mass activities with regard to Ru in different catalysts with followed equation:

$$\text{Mass activity related to Ru (MA}_{Ru}) = j \times S/m_{Ru}$$

Turnover frequency (TOF) values were calculated as below:

$$TOF = j \times S/(z \times F \times n_{metal})$$

where  $C_s$  denotes the specific capacitance for a 1 cm<sup>2</sup> flat surface, which is generally considered as 0.04 mF cm<sup>-2</sup>;  $S$  represents the geometric area coated by catalysts, which is 0.09 cm<sup>2</sup> in this work;  $j$  signifies the current density;  $m_{Ru}$  denotes the mass of Ru;  $z$  represents the number of electrons accepted for the generation of each H<sub>2</sub> molecule (2 for HER process);  $F$  represents the Faraday constant (96485.3 C mol<sup>-1</sup>);  $n_{metal}$  represents the total amount of moles of all the active metal (Ru and Cr) in the catalyst.

All the aforementioned electrochemical measurements were conducted with iR compensation unless otherwise stated. For chronoamperometric measurements (i-t), the as-prepared catalysts or commercial catalysts were applied to CP with a mass loading of 2 mg cm<sup>-2</sup>.

### **DFT calculation methods.**

Periodic density functional theory (DFT) calculations were performed using the CASTEP module implemented in Material Studio. The exchange-correlation interactions were treated within the generalized gradient approximation (GGA) in the form of the Perdew-Burke-Ernzerhof (PBE) function. The van der Waals interactions were described using the empirical correction in Grimme's scheme. We used plane wave basis with a cut-off energy of 500 eV, self-consistent field (SCF) tolerance of

$2 \times 10^{-6}$  eV, energy  $2 \times 10^{-5}$  eV per atom, maximum force 0.05 eV per Å, maximum stress 0.1 GPa and maximum displacement 0.002 Å, respectively, for the geometry optimization. The Brillouin zone was sampled by  $(1 \times 1 \times 1)$  Monkhorst-Pack  $k$ -point mesh.

In order to avoid interactions between periodic images, a vacuum space of 15 Å was applied to all calculations. For projected density of states (PDOS) calculations, the  $k$ -points were set to be  $4 \times 2 \times 1$ . The free energy diagram along the reaction pathway was calculated as follows:

$$\Delta G = \Delta E_{ads.} + \Delta E_{ZPE} - T\Delta S$$

where  $\Delta E_{ads.}$  is the adsorption energy defined as the electronic energy difference,  $\Delta E_{ZPE}$  is the change in zero-point energies,  $T$  is the temperature (298.15K) and  $\Delta S$  is the entropy changes.

For the Ru/Cr<sub>2</sub>O<sub>3</sub> model, the crystal plane of Ru and Cr<sub>2</sub>O<sub>3</sub> is (101) and (110) plane, respectively, and these two planes are spliced into Ru/Cr<sub>2</sub>O<sub>3</sub> model. The lattice mismatch rate is 5.0%. For the Ru model, the crystal plane of Ru is (101) plane. For the RuCrO<sub>x</sub> model, the (110) plane of RuO<sub>2</sub> is selected as model base, the ratio between Ru and Cr is 3:1, Cr is dopped into RuO<sub>2</sub> by replacing the Ru atoms. The vacuum layer height is 15 Å. The cell parameters of Ru/Cr<sub>2</sub>O<sub>3</sub>, Ru and RuCrO<sub>x</sub> are  $20.0 \times 12.2 \times 26.0$ ,  $12.7 \times 12.8 \times 20.8$  and  $12.4 \times 12.7 \times 23.3$ . The model structures are shown in Fig. S25.

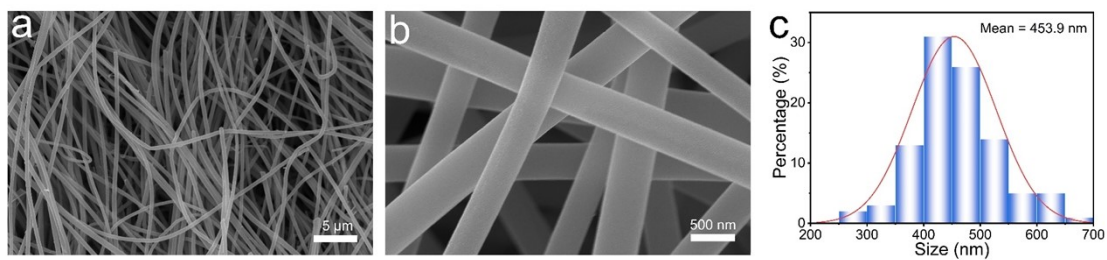

**Fig. S1.** SEM images of  $\text{RuCl}_3/\text{Cr}(\text{Ac})_3$ -PVP precursor NFs with (a) low magnification and (b) high magnification. (c) Diameter distribution of  $\text{RuCl}_3/\text{Cr}(\text{Ac})_3$ -PVP precursor NFs.

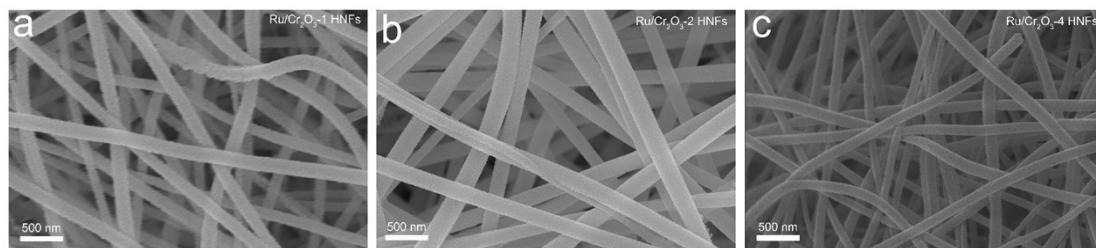

**Fig. S2.** SEM images of (a) Ru/Cr<sub>2</sub>O<sub>3</sub>-1 HNFs, (b) Ru/Cr<sub>2</sub>O<sub>3</sub>-2 HNFs and (c) Ru/Cr<sub>2</sub>O<sub>3</sub>-4 HNFs.

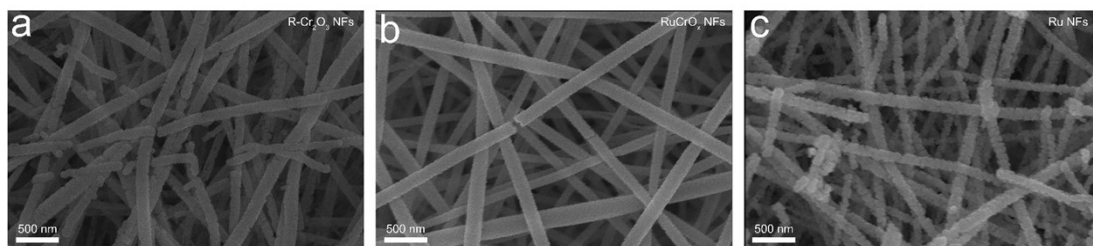

**Fig. S3.** SEM images of (a) R-Cr<sub>2</sub>O<sub>3</sub> NFs, (b) RuCrO<sub>x</sub> NFs and (c) Ru NFs.



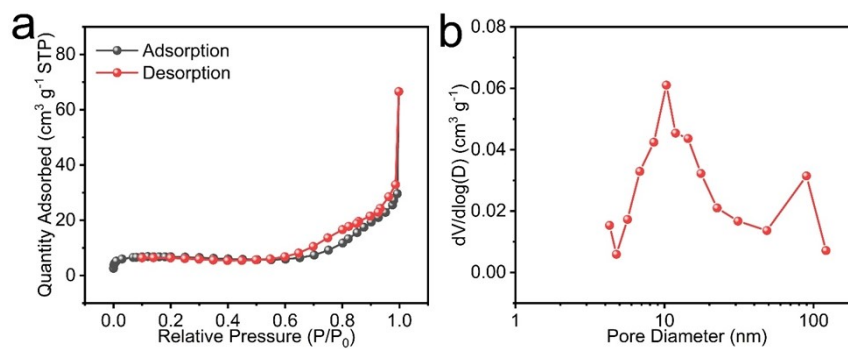

**Fig. S4.** (a) The N<sub>2</sub> adsorption-desorption isotherms and (b) corresponding pore size distribution of Ru/Cr<sub>2</sub>O<sub>3</sub> HNFs.

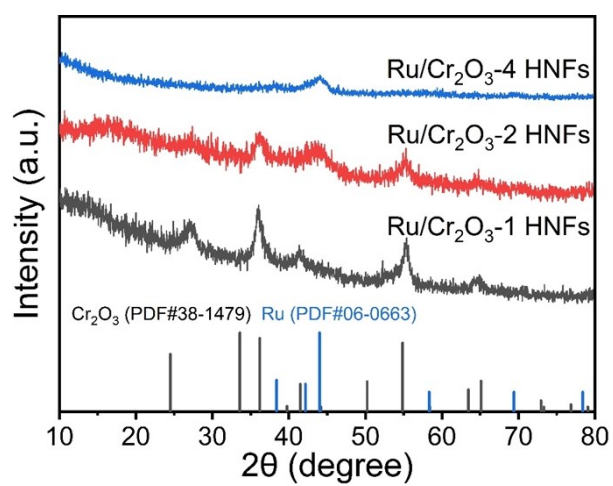

**Fig. S5.** XRD patterns of Ru/Cr<sub>2</sub>O<sub>3</sub>-1 HNFs, Ru/Cr<sub>2</sub>O<sub>3</sub>-2 HNFs and Ru/Cr<sub>2</sub>O<sub>3</sub>-4 HNFs.

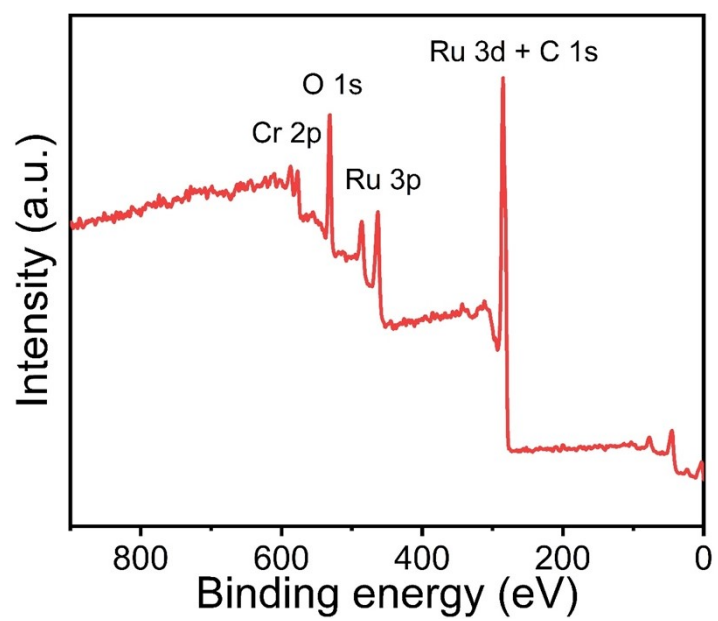

**Fig. S6.** XPS survey spectrum of Ru/Cr<sub>2</sub>O<sub>3</sub> HNFs.

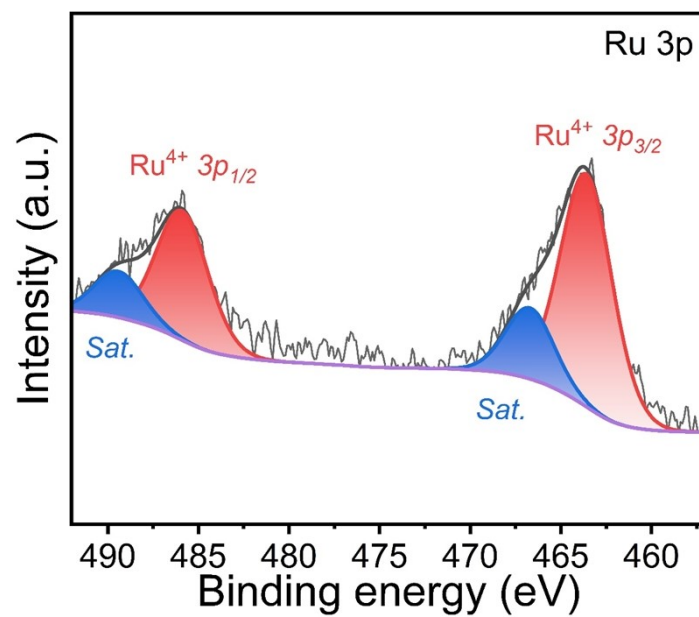

**Fig. S7.** Typical high-resolution Ru 3p XPS spectrum of RuCrO<sub>x</sub> NFs.

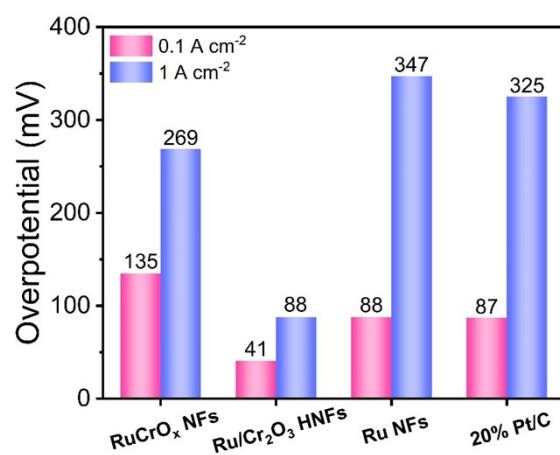

**Fig. S8.** Comparison of overpotentials of Ru/Cr<sub>2</sub>O<sub>3</sub> HNFs and other catalysts for HER in 1 M KOH.

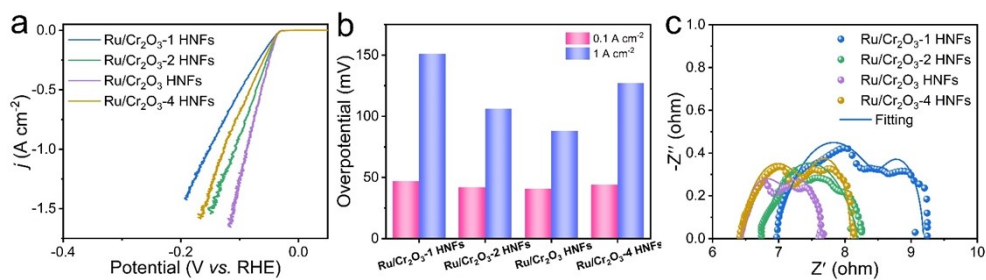

**Fig. S9.** Electrochemical tests of different HNFs for HER in 1 M KOH solution. (a) LSV curves, and (b) Comparison of overpotentials at 0.1 A cm<sup>-2</sup> and 1 A cm<sup>-2</sup> of different catalysts. (c) Nyquist plots and fitting curves at -1.0 V *versus* Hg/HgO electrode for HER.

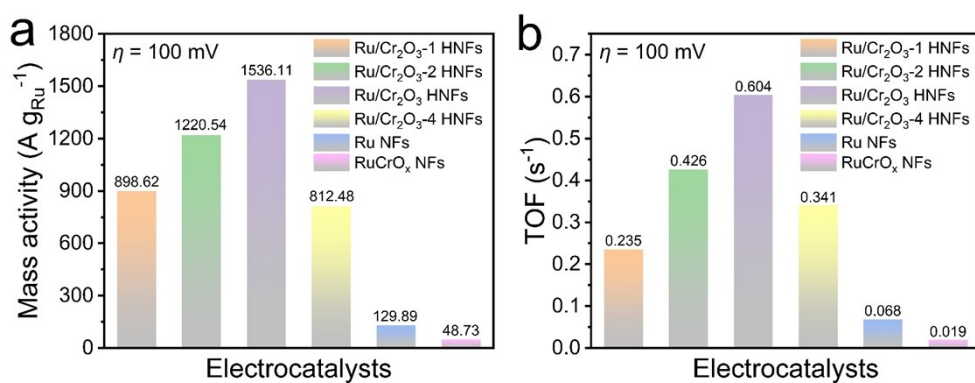

**Fig. S10.** Comparison of (a) the mass activities related to Ru element and (b) TOF values for Ru/Cr<sub>2</sub>O<sub>3</sub> HNFs and other control catalysts toward HER process in 1 M KOH solution.

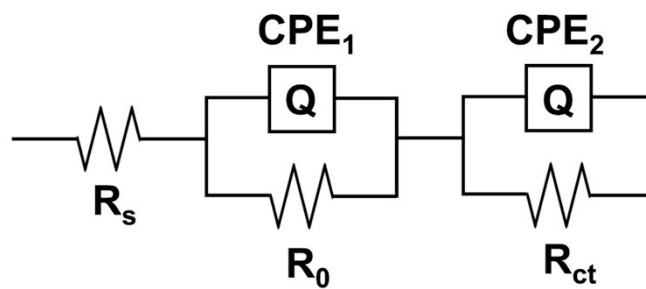

**Fig. S11.** The equivalent circuit model of electrodes. Where  $R_s$  is the solution resistance,  $CPE_1$  and  $R_0$  are the constant phase element and contact resistance between catalysts and electrode, respectively.  $CPE_2$  is the double-layer capacitance, and  $R_{ct}$  is the charge transfer resistance at catalysts/electrolyte interface related to the HER electrocatalysis process.



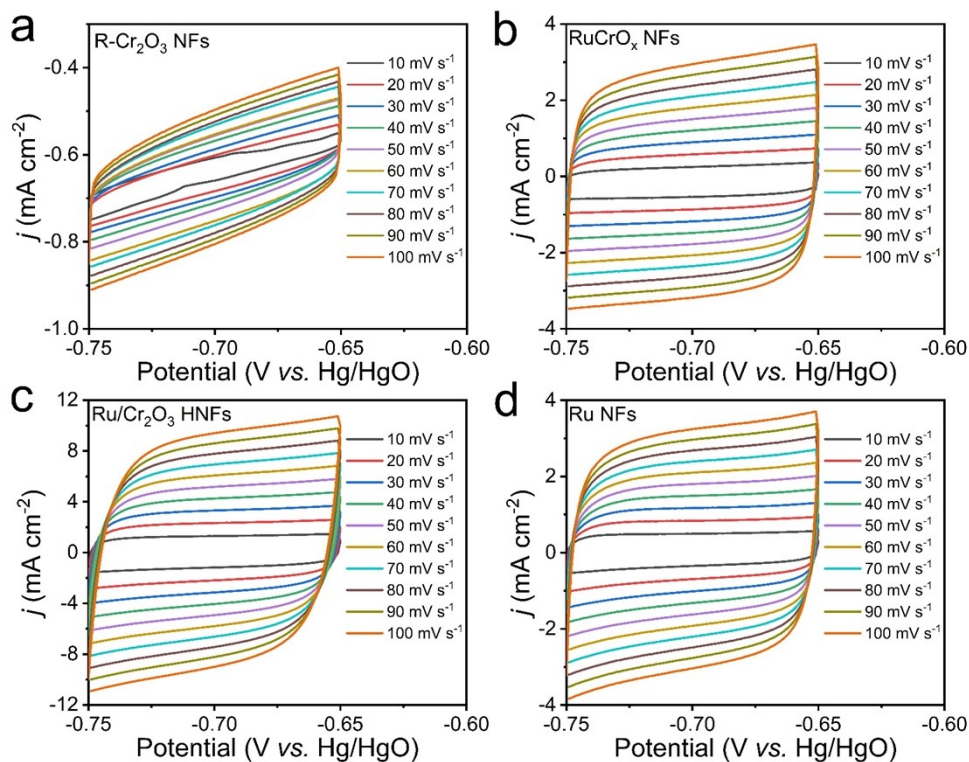

**Fig. S12.** The CV curves of the current density against the scan rate of (a) R- $\text{Cr}_2\text{O}_3$  NFs, (b)  $\text{RuCrO}_x$  NFs, (c)  $\text{Ru/Cr}_2\text{O}_3$  HNFs and (d) Ru NFs for HER in 1 M KOH solution.

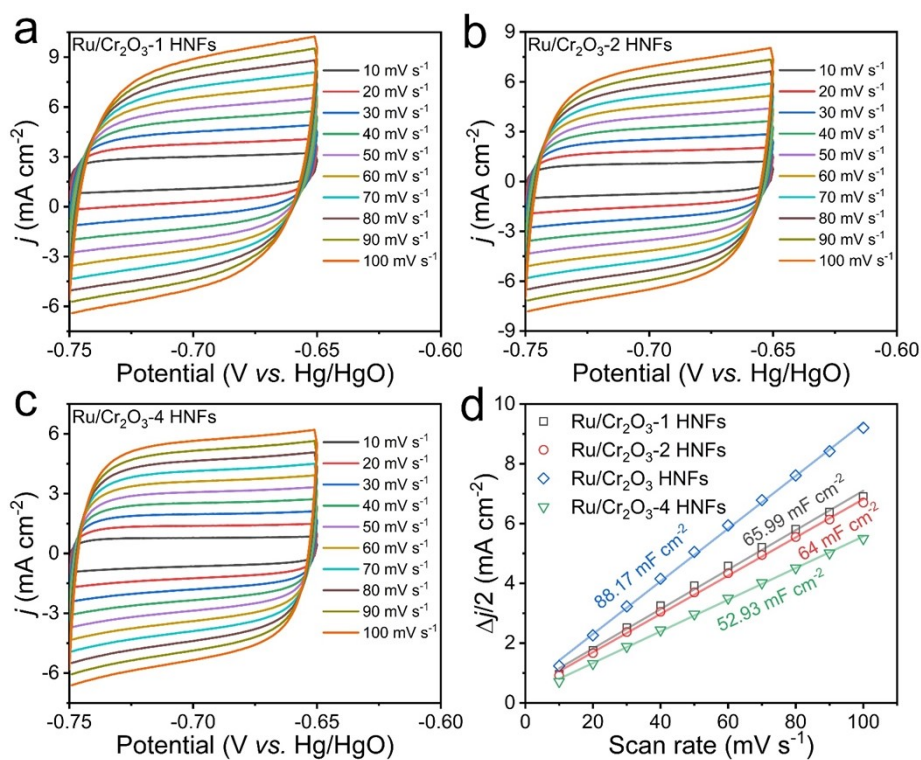

**Fig. S13.** The CV curves of the current density against the scan rate of (a) Ru/Cr<sub>2</sub>O<sub>3</sub>-1 HNFs, (b) Ru/Cr<sub>2</sub>O<sub>3</sub>-2 HNFs and (c) Ru/Cr<sub>2</sub>O<sub>3</sub>-4 HNFs for HER in 1 M KOH solution. (d)  $C_{dl}$  plots inferred from CV curves of different catalysts.

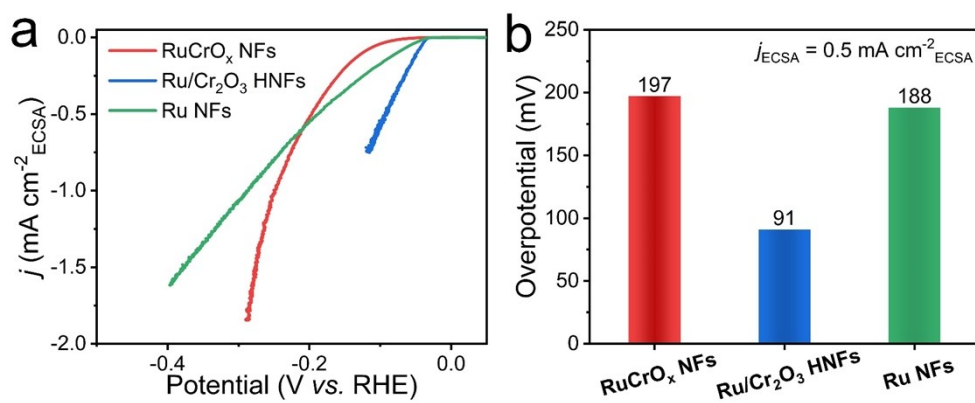

**Fig. S14.** (a) HER polarization curves normalized to ECSA in 1 M KOH and (b) the corresponding specific activities at the current density of  $0.5 \text{ mA cm}^{-2}_{\text{ECSA}}$  of Ru/Cr<sub>2</sub>O<sub>3</sub> HNFs and control catalysts.

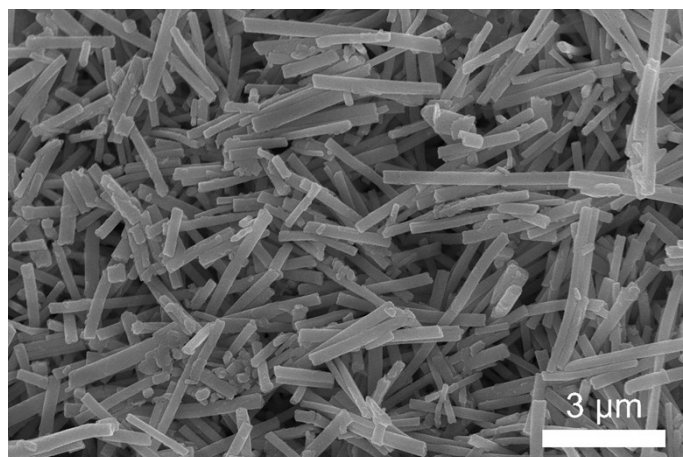

**Fig. S15.** SEM image of Ru/Cr<sub>2</sub>O<sub>3</sub> HNFs after HER stability test in 1 M KOH solution.

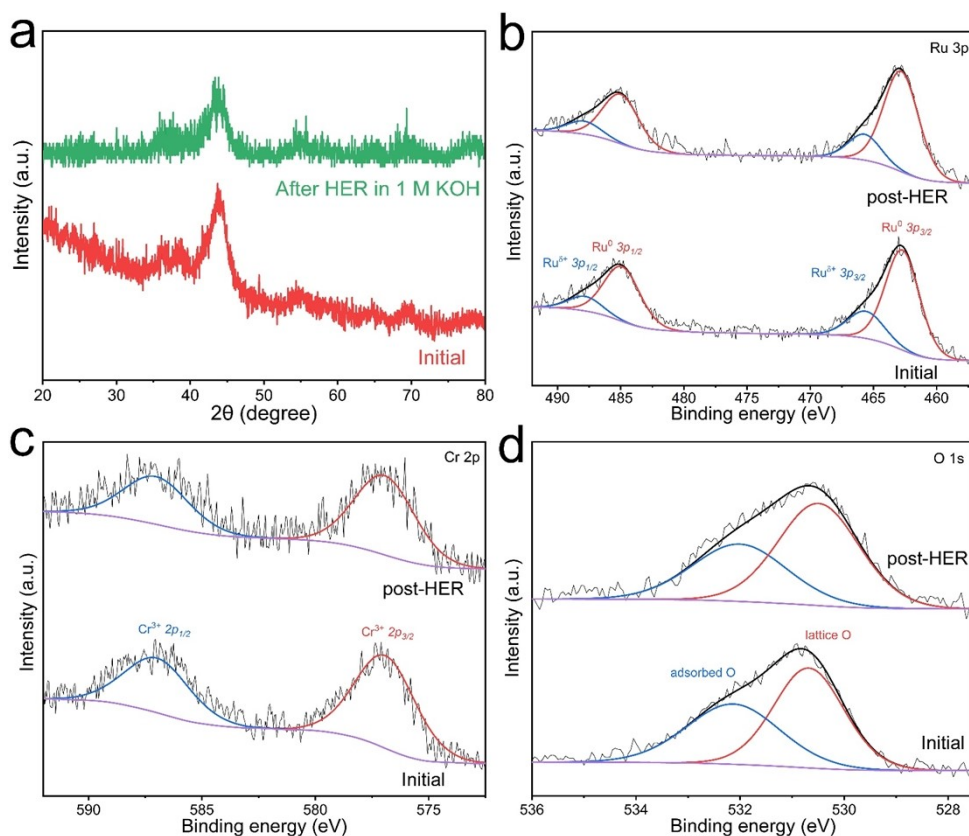

**Fig. S16.** (a) XRD patterns, (b) typical high-resolution Ru 3p XPS spectra, (c) typical high-resolution Cr 2p XPS spectra and (d) typical high-resolution O 1s XPS spectra of Ru/Cr<sub>2</sub>O<sub>3</sub> HNFs before and after HER stability test in 1 M KOH solution.

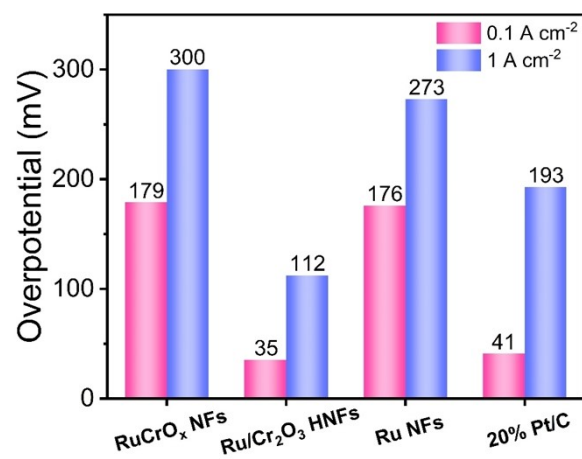

**Fig. S17.** Comparison of overpotentials of Ru/Cr<sub>2</sub>O<sub>3</sub> HNFs and other catalysts for HER in 0.5 M H<sub>2</sub>SO<sub>4</sub>.

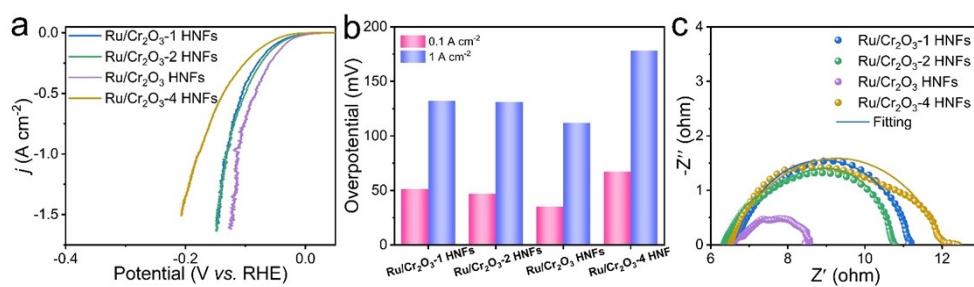

**Fig. S18.** Electrochemical tests of different HNFs for HER in 0.5 M H<sub>2</sub>SO<sub>4</sub> solution. (a) LSV curves, and (b) Comparison of overpotentials at 0.1 A cm<sup>-2</sup> and 1 A cm<sup>-2</sup> of different catalysts. (c) Nyquist plots and fitting curves at -0.3 V *versus* Ag/AgCl electrode for HER.

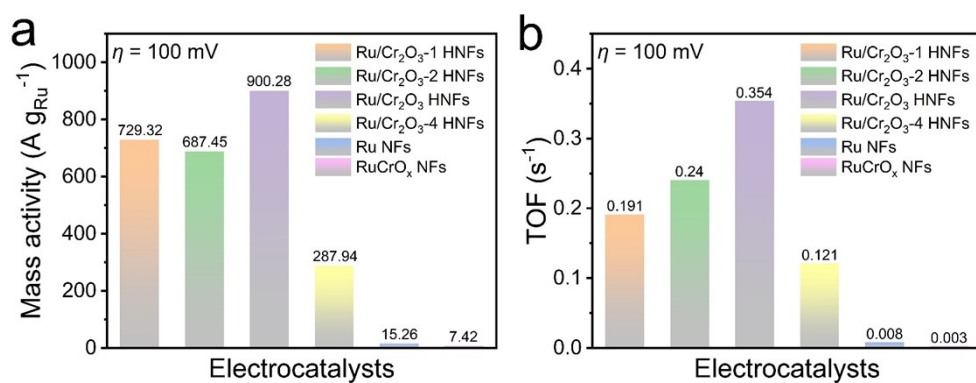

**Fig. S19.** Comparison of (a) the mass activities related to Ru element and (b) TOF values for Ru/Cr<sub>2</sub>O<sub>3</sub> HNFs and other control catalysts toward HER process in 0.5 M H<sub>2</sub>SO<sub>4</sub> solution.



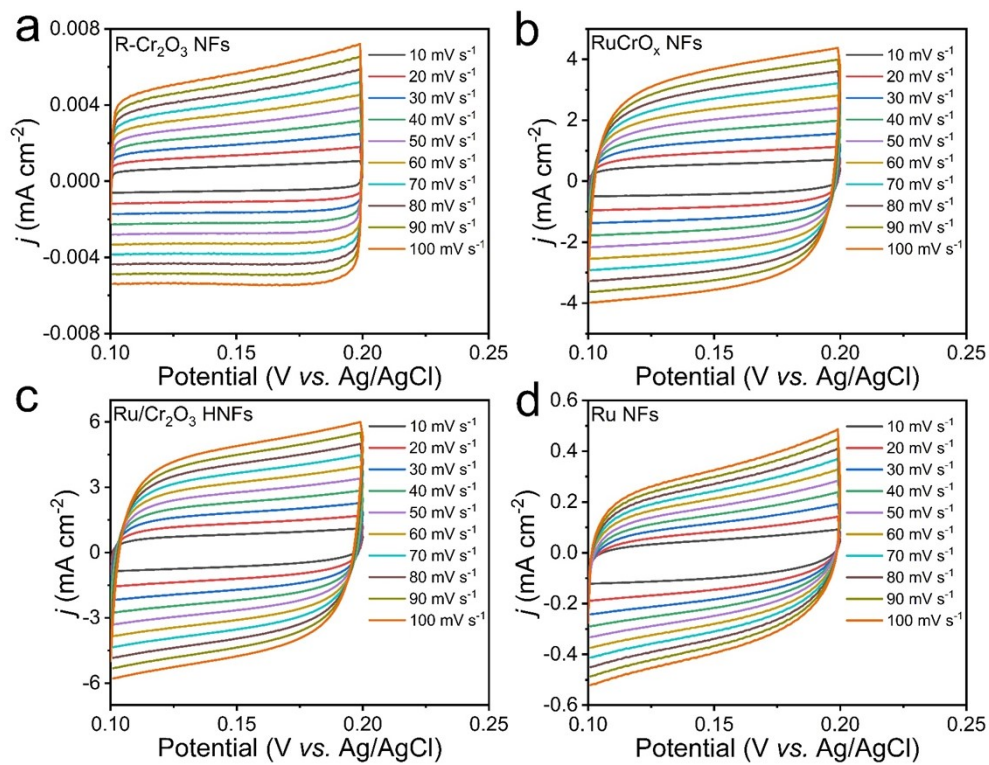

**Fig. S20.** The CV curves of the current density against the scan rate of (a) R- $\text{Cr}_2\text{O}_3$  NFs, (b) RuCrO $_x$  NFs, (c) Ru/ $\text{Cr}_2\text{O}_3$  HNFs and (d) Ru NFs for HER in 0.5 M  $\text{H}_2\text{SO}_4$  solution.

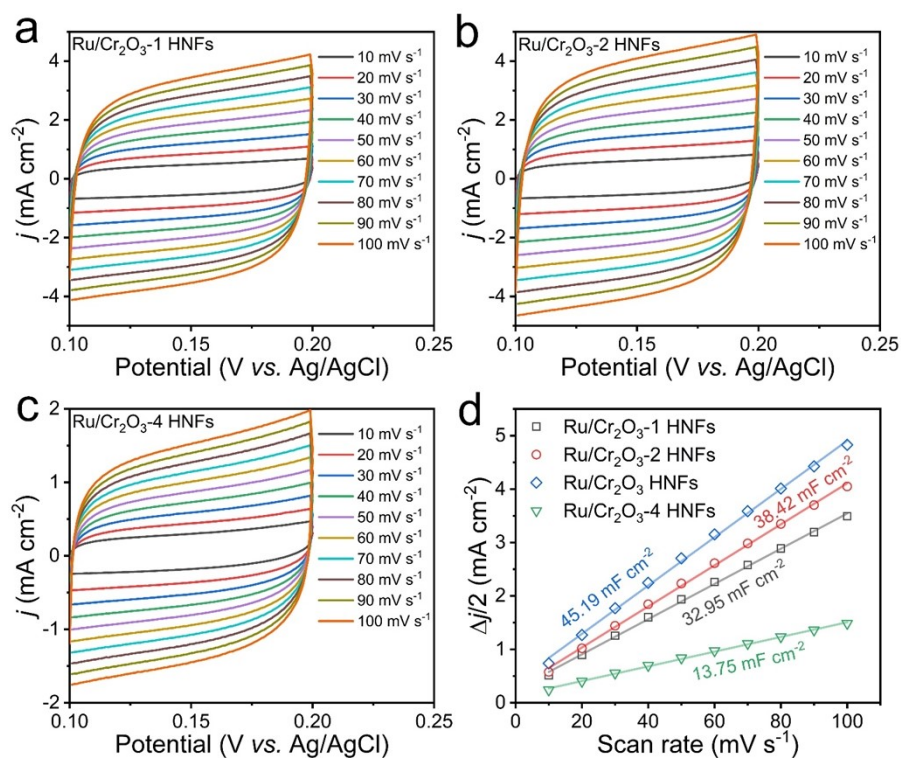

**Fig. S21.** The CV curves of the current density against the scan rate of (a) Ru/Cr<sub>2</sub>O<sub>3</sub>-1 HNFs, (b) Ru/Cr<sub>2</sub>O<sub>3</sub>-2 HNFs and (c) Ru/Cr<sub>2</sub>O<sub>3</sub>-4 HNFs for HER in 0.5 M H<sub>2</sub>SO<sub>4</sub> solution. (d)  $C_{dl}$  plots inferred from CV curves of different catalysts.

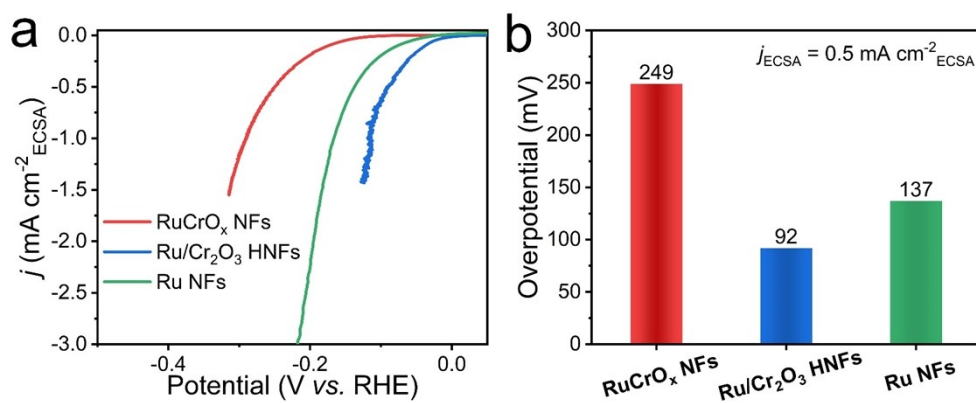

**Fig. S22.** (a) HER polarization curves normalized to ECSA in 0.5 M H<sub>2</sub>SO<sub>4</sub> and (b) the corresponding specific activities at the current density of 0.5 mA cm<sup>-2</sup><sub>ECSA</sub> of Ru/Cr<sub>2</sub>O<sub>3</sub> HNFs and control catalysts.

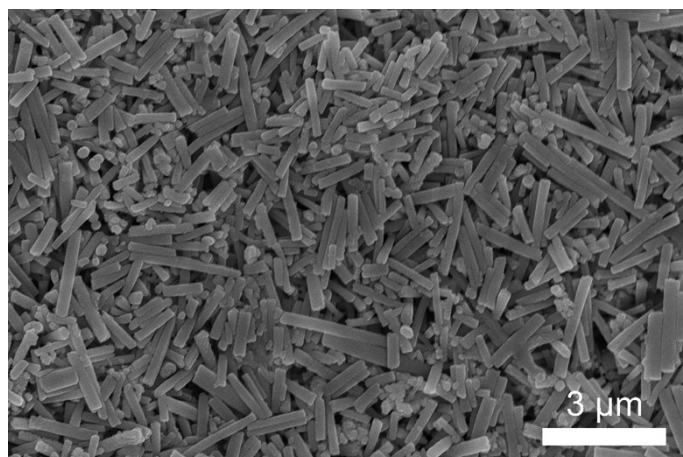

**Fig. S23.** SEM image of Ru/Cr<sub>2</sub>O<sub>3</sub> HNFs after HER stability test in 0.5 M H<sub>2</sub>SO<sub>4</sub> solution.

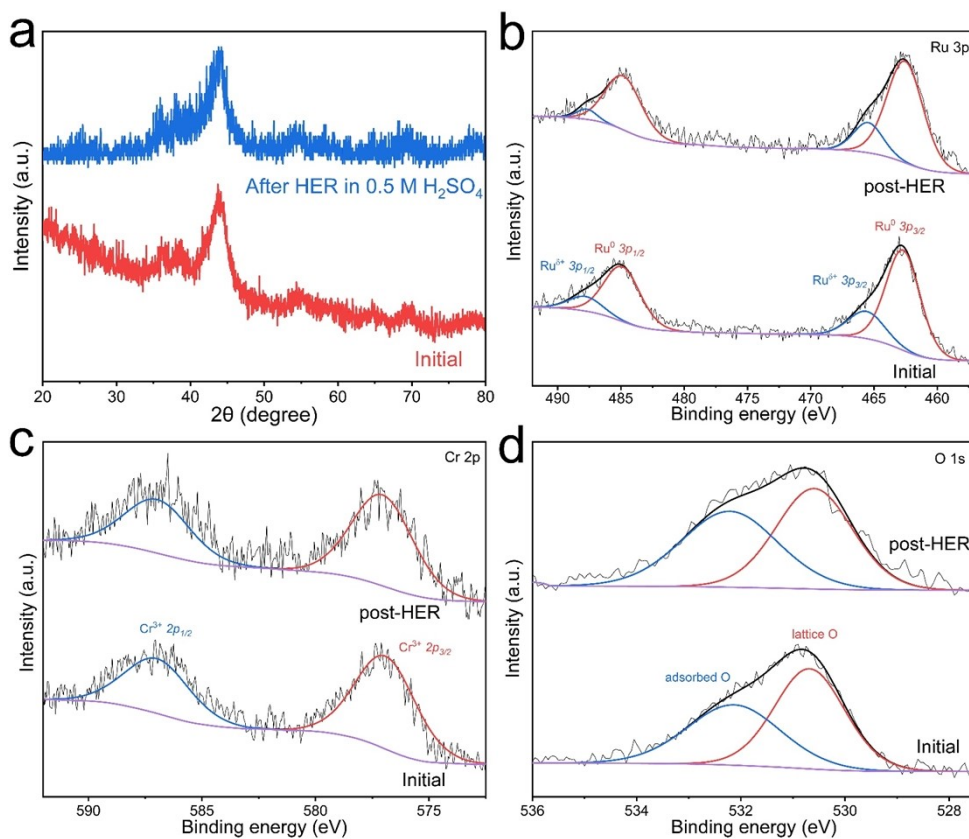

**Fig. S24.** (a) XRD patterns, (b) typical high-resolution Ru 3p XPS spectra, (c) typical high-resolution Cr 2p XPS spectra and (d) typical high-resolution O 1s XPS spectra of Ru/Cr<sub>2</sub>O<sub>3</sub> HNFs before and after HER stability test in 0.5 M H<sub>2</sub>SO<sub>4</sub> solution.

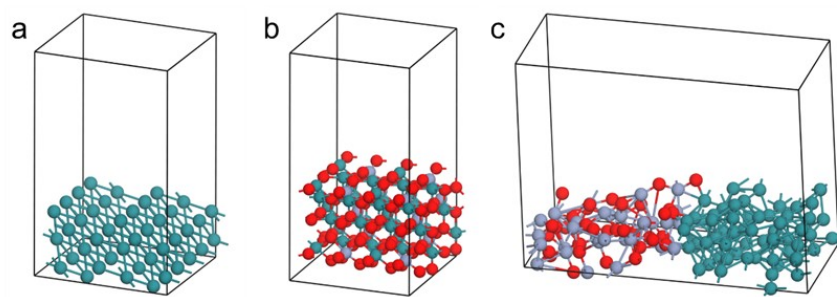

**Fig. S25.** The optimized models for (a) Ru(101), (b) RuCrO<sub>x</sub> and (c) Ru/Cr<sub>2</sub>O<sub>3</sub>.

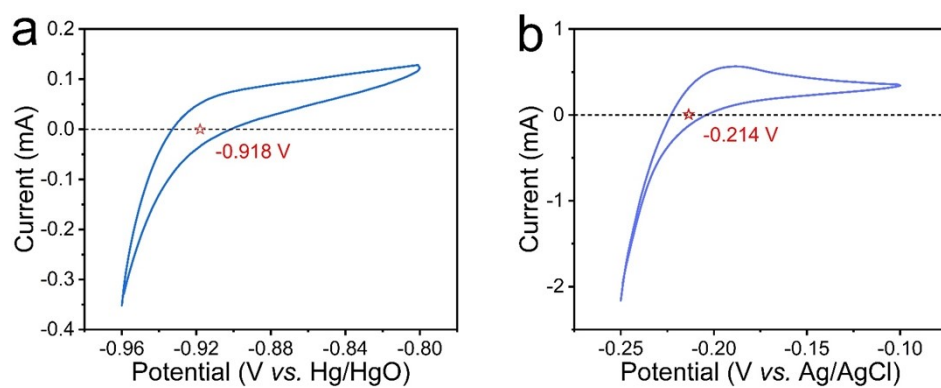

**Fig. S26.** The CV curves for the calibration of (a) Hg/HgO and (b) Ag/AgCl reference electrodes at the scan rate of  $1 \text{ mV s}^{-1}$  in  $\text{H}_2$ -saturated 1 M KOH solution or 0.5 M  $\text{H}_2\text{SO}_4$  solution, respectively.

**Table S1.** Comparison of the HER performances among our catalyst and recently reported electrocatalysts in 1 M KOH solution.

| Sample                                                                     | Substrate                | $\eta@1\text{ A cm}^{-2}$<br>(mV) | Tafel slope<br>(mV dec <sup>-1</sup> ) | Ref.                                                        |
|----------------------------------------------------------------------------|--------------------------|-----------------------------------|----------------------------------------|-------------------------------------------------------------|
| <b>Ru/Cr<sub>2</sub>O<sub>3</sub> HNFs</b>                                 | CP                       | 88                                | 5.2                                    | This work                                                   |
| <b>Commercial Pt/C</b>                                                     | CP                       | 325                               | 15.5                                   | This work                                                   |
| <b>Ru<sub>SAs</sub>/Ni(OH)<sub>2</sub>@Fe<br/>OOH</b>                      | NF                       | 267                               | 72                                     | Chem. Eng. J.<br><b>2024</b> , 479, 147500.                 |
| <b>V-Ru<sub>x</sub>P<sub>y</sub></b>                                       | CP                       | 180                               | 21.56                                  | Adv. Funct. Mater.<br><b>2024</b> , 34 (28), 2315773.       |
| <b>W<sub>0.05</sub>-RuP<sub>2</sub>@C<sub>3</sub>N<sub>4</sub>-<br/>NC</b> | NF                       | 194                               | 84                                     | Appl. Catal. B-Environ.<br><b>2022</b> , 304, 120917.       |
| <b>Mn<sub>0.05</sub>Ru<sub>0.95</sub>O<sub>2</sub> NFs</b>                 | CP                       | 269                               | 39.2                                   | Small.<br><b>2024</b> , 20 (15), 2307164.                   |
| <b>Sr<sub>2</sub>RuO<sub>4</sub></b>                                       | Cu wire                  | 278                               | 22                                     | Nat. Commun.<br><b>2022</b> , 13 (1), 7784.                 |
| <b>Pd<sub>4</sub>S/Pd<sub>3</sub>P<sub>0.95</sub></b>                      | GCE                      | 486                               | 67.5                                   | Adv. Energy Mater.<br><b>2022</b> , 12 (11), 2103511.       |
| <b>NA-Ru<sub>3</sub>Ni/C</b>                                               | GCE                      | 168                               | 28                                     | Energy Environ. Sci.<br><b>2023</b> , 16 (1), 285.          |
| <b>Pt@NiFc-MOF</b>                                                         | NF                       | 252                               | 31                                     | Adv. Funct. Mater.<br><b>2024</b> , 2401011.                |
| <b>Ni<sub>9.5</sub>Co<sub>0.5</sub>-S-FeO<sub>x</sub></b>                  | Cu foam                  | 230                               | 71.4                                   | Angew. Chem. Int. Ed.<br><b>2023</b> , 62 (39), e202308670. |
| <b>Co<sub>6</sub>Mo<sub>6</sub>C-Ir-2 NFs</b>                              | CP                       | 348                               | 96.1                                   | Chem. Sci.<br><b>2024</b> , 15 (30), 11890.                 |
| <b>(FeCoNiB<sub>0.75</sub>)<sub>97</sub>Pt<sub>3</sub></b>                 | Self-supported<br>Ribbon | 104                               | 30.9                                   | Adv. Mater.<br><b>2023</b> , 35 (38), 2303439.              |
| <b>Ru<sub>SA</sub>@Ti<sub>3</sub>C<sub>2</sub>T<sub>x</sub></b>            | CC                       | 425.7                             | 90                                     | EcoMat                                                      |



|  |  |  |  |                              |
|--|--|--|--|------------------------------|
|  |  |  |  | <b>2023</b> , 5 (1), e12274. |
|--|--|--|--|------------------------------|

**Table S2.** Comparison of the  $C_{dl}$ , ECSA and RF values of Ru/Cr<sub>2</sub>O<sub>3</sub> HNFs with other catalysts in 1 M KOH solution.

| Catalysts                                 | $C_{dl}$ (mF cm <sup>-2</sup> ) | ECSA (cm <sup>2</sup> ) | RF      |
|-------------------------------------------|---------------------------------|-------------------------|---------|
| Ru/Cr <sub>2</sub> O <sub>3</sub> -1 HNFs | 65.99                           | 148.4775                | 1649.75 |
| Ru/Cr <sub>2</sub> O <sub>3</sub> -2 HNFs | 64                              | 144                     | 1600    |
| Ru/Cr <sub>2</sub> O <sub>3</sub> HNFs    | 88.17                           | 198.3825                | 2204.25 |
| Ru/Cr <sub>2</sub> O <sub>3</sub> -4 HNFs | 52.93                           | 119.0925                | 1323.25 |
| Ru NFs                                    | 30.06                           | 67.635                  | 751.5   |
| RuCrO <sub>x</sub> NFs                    | 29.59                           | 66.5775                 | 739.75  |
| R-Cr <sub>2</sub> O <sub>3</sub> NFs      | 1.44                            | 3.24                    | 36      |

**Table S3.** Comparison of the HER performances among our catalyst and recently reported electrocatalysts in 0.5 M H<sub>2</sub>SO<sub>4</sub> solution.

| Sample                                                | Substrate          | $\eta@1 \text{ A cm}^{-2}$<br>(mV) | Tafel slope<br>(mV dec <sup>-1</sup> ) | Ref.                                                  |
|-------------------------------------------------------|--------------------|------------------------------------|----------------------------------------|-------------------------------------------------------|
| <b>Ru/Cr<sub>2</sub>O<sub>3</sub> HNFs</b>            | CP                 | 112                                | 33.4                                   | This work                                             |
| <b>Commercial Pt/C</b>                                | CP                 | 193                                | 38.3                                   | This work                                             |
| <b>IC-Pd@BNNTs</b>                                    | CP                 | 199                                | 35.7                                   | Appl. Catal. B-Environ.<br><b>2024</b> , 345, 123609. |
| <b>Pt/N-CoWO<sub>3</sub></b>                          | CC                 | 94                                 | 28                                     | Adv. Energy Mater.<br><b>2024</b> , 14 (19), 2303635. |
| <b>2H Nb<sub>1.35</sub>S<sub>2</sub></b>              | GCE                | 370                                | 38                                     | Nat. Mater.<br><b>2019</b> , 18 (12), 1309.           |
| <b>Pt-Er/h-NC</b>                                     | GCE                | 167                                | 17.1                                   | J. Am. Chem. Soc.<br><b>2023</b> , 145 (40), 22069    |
| <b>Co/Se-MoS<sub>2</sub>-NF</b>                       | CP                 | 382                                | 67                                     | Nat. Commun.<br><b>2020</b> , 11 (1), 3315.           |
| <b>CoRu/NC-700</b>                                    | GCE                | 227                                | 21.4                                   | Chem. Eng. J.<br><b>2022</b> , 450, 138026.           |
| <b>HC-MoS<sub>2</sub>/Mo<sub>2</sub>C</b>             | Cu foam            | 412                                | 60                                     | Nat. Commun.<br><b>2020</b> , 11 (1), 3724.           |
| <b>Co-NC-AF</b>                                       | Self-<br>supported | 343                                | 67.6                                   | Adv. Mater.<br><b>2021</b> , 33 (41), 2103533.        |
| <b>Pd<sub>4</sub>S/Pd<sub>3</sub>P<sub>0.95</sub></b> | GCE                | 538                                | 27.8                                   | Adv. Energy Mater.<br><b>2022</b> , 12 (11), 2103511. |
| <b>Pt-Ru/CNT</b>                                      | GCE                | 155                                | 23                                     | Small.<br><b>2022</b> , 18 (3), 2104559.              |
| <b>PtM/p-GO</b>                                       | GCE                | 130                                | 23                                     | Chem. Eng. J.<br><b>2023</b> , 460, 141676.           |
| <b>Cu-m/Cu-W/NiCo-</b>                                | Cu mesh            | 246                                | 79.4                                   | Chem. Sci.                                            |

|                              |         |      |    |                                             |
|------------------------------|---------|------|----|---------------------------------------------|
| <b>LDH</b>                   |         |      |    | <b>2020</b> , 11 (15), 3893.                |
| <b>Ta-TaS<sub>2</sub> MC</b> | Ta foil | ≈290 | 30 | Nat. Commun.<br><b>2021</b> , 12 (1), 6051. |

**Table S4.** Comparison of the  $C_{dl}$ , ECSA and RF values of Ru/Cr<sub>2</sub>O<sub>3</sub> HNFs with other catalysts in 0.5 M H<sub>2</sub>SO<sub>4</sub> solution.

| Catalysts                                 | $C_{dl}$ (mF cm <sup>-2</sup> ) | ECSA (cm <sup>2</sup> ) | RF      |
|-------------------------------------------|---------------------------------|-------------------------|---------|
| Ru/Cr <sub>2</sub> O <sub>3</sub> -1 HNFs | 32.95                           | 74.1375                 | 823.75  |
| Ru/Cr <sub>2</sub> O <sub>3</sub> -2 HNFs | 38.42                           | 86.445                  | 960.5   |
| Ru/Cr <sub>2</sub> O <sub>3</sub> HNFs    | 45.19                           | 101.6775                | 1129.75 |
| Ru/Cr <sub>2</sub> O <sub>3</sub> -4 HNFs | 13.75                           | 30.9375                 | 343.75  |
| Ru NFs                                    | 3.13                            | 7.0425                  | 78.25   |
| RuCrO <sub>x</sub> NFs                    | 34.6                            | 77.85                   | 865     |
| R-Cr <sub>2</sub> O <sub>3</sub> NFs      | 0.05                            | 0.1125                  | 1.25    |
